# Supplementary material for: Roux-en-Y duodenojejunostomy improves gastric emptying in experimental obstruction of the distal duodenum
Source: PLoS One. 2018 Jun 28;13(6):e0199759. doi: 10.1371/journal.pone.0199759 (PMC6023136; doi:10.1371/journal.pone.0199759)
Supplement: S1 Table — Table: IndividualGastricEmptyingData. (XLSX) [file pone.0199759.s001.xlsx]

## Sheet: Individual GE data
		T½ = gastric half emptying time (min)				S = surve shape parameter (dimensionless)
Group	DOG name	T½_BASAL	T½_EARLY postoperative	T½_MEDIUM postperative	T½_LATE postoperative	S_BASAL	S_EARLY postoperative	S_MEDIUM postperative	S_LATE postoperative
GA	RUDY	242.3	280.2	360	153.6	0.681	1.571	1.371	1.949
GA	BORYS	360	360	360	251.1	1.341	3.618	1.422	2.104
GA	NERO	238	360	181.6	360	1.3	0.998	1.463	1.593
GA	FIDO	150.2	233.1	128.8	181.9	1.126	1.445	1.411	1.784
GA	DINGO	148.1	360	360	274.7	1.27	0.66	1.675	1.509
DA	AZOR	360	274.4	360	271.1	1.199	3.756	0.706	1.13
DA	ŁAPA	176.5	129.2	301	142.6	0.9	1.023	0.898	1.663
DA	ŁATEK	103.6	125.1	169.1	93.5	0.981	0.944	0.476	0.892
DA	KLARA	103.6	109.4	192.8	360	1.275	2.264	1.05	0.832
DA	PUDI	116	133.4	67.4	88.4	1.404	1.598	1.118	1.2
		T½_BASAL	T½_EARLY postoperative	T½_MEDIUM postperative	T½_LATE postoperative	S_BASAL	S_EARLY postoperative	S_MEDIUM postperative	S_LATE postoperative
	GA mean	227.72	318.66	278.08	244.26	1.1436	1.6584	1.4684	1.7878
	DA Mean	171.94	154.3	218.06	191.12	1.1518	1.917	0.8496	1.1434
	GA SE	38.8362	26.3881	50.8555	36.3848	0.121184	0.516049	0.0536876	0.109922
	DA SE	48.9169	30.2981	51.3613	53.5502	0.093163	0.517207	0.117205	0.147231
Surgery variant: gastrointestinal anastomosis (GA) or duodenointestinal anastomosis (DA)
Postoperative periods considered are: early (2-3 weeks), medium (3 months) and late (6 months) after the surgery
